# Supplementary material for: Interactions between Diet and Exposure to Secondhand Smoke on the Prevalence of Childhood Obesity: Results from NHANES, 2007–2010
Source: PubMed Central journal article supplement (PMC4977048; doi:10.1289/ehp.1510138), 2015-12-29
Supplement: ehp.1510138.s001.acco.pdf [file ehp.1510138.s001.acco.pdf]

**Note to readers with disabilities:** *EHP* strives to ensure that all journal content is accessible to all readers. However, some figures and Supplemental Material published in *EHP* articles may not conform to [508 standards](#) due to the complexity of the information being presented. If you need assistance accessing journal content, please contact [ehp508@niehs.nih.gov](mailto:ehp508@niehs.nih.gov). Our staff will work with you to assess and meet your accessibility needs within 3 working days.

## **Supplemental Material**

### **Interactions between Diet and Exposure to Secondhand Smoke on the Prevalence of Childhood Obesity: Results from NHANES, 2007–2010**

Brianna F. Moore, Maggie L. Clark, Annette Bachand, Stephen J. Reynolds, Tracy L. Nelson, and Jennifer L. Peel

#### **Table of Contents**

**Table S1.** Comparison of weight categories among 6-19 year olds, 2007-2010 NHANES

**Table S2.** Spearman rank correlation coefficients for dietary nutrients among 6-19 year olds, 2007-2010 NHANES

**Table S3.** Crude and adjusted models for the association of exposure to SHS exposure and overweight and obesity<sup>a</sup> among U.S. children, ages 6-19 years, 2007-2010 NHANES

**Table S1.** Comparison of weight categories among 6-19 year olds, 2007-2010 NHANES

|                                             | U.S. Definition <sup>a</sup> |            |       |
|---------------------------------------------|------------------------------|------------|-------|
|                                             | Normal/underweight           | Overweight | Obese |
| <b>International Definition<sup>b</sup></b> |                              |            |       |
| Normal/underweight                          | 99%                          | 1%         | 0%    |
| Overweight                                  | 24%                          | 68%        | 8%    |
| Obese                                       | 0%                           | 2%         | 98%   |

Abbreviations: NHANES, National Health and Nutrition Examination Survey

<sup>a</sup>Overweight was defined as having a body mass index  $\geq 85$ th percentile and  $< 95$ th percentile and obesity was defined as having a body mass index  $\geq 95$ th percentile by age and sex, based on the 2000 Centers for Disease Control and Prevention growth charts.

<sup>b</sup>Overweight and obesity is defined as having a body mass index that corresponds to a body mass index of 25 and 30 at age 18, respectively, based on the International Obesity Task Force growth charts.

**Table S2.** Spearman rank correlation coefficients for dietary nutrients among 6-19 year olds, 2007-2010 NHANES

|               | Dietary Fiber | Vitamin C | Vitamin E | EPA  | DHA |
|---------------|---------------|-----------|-----------|------|-----|
| Dietary Fiber | 1             |           |           |      |     |
| Vitamin C     | 0.39          | 1         |           |      |     |
| Vitamin E     | 0.65          | 0.36      | 1         |      |     |
| EPA           | 0.18          | 0.11      | 0.28      | 1    |     |
| DHA           | 0.08          | 0.13      | 0.22      | 0.70 | 1   |

Abbreviations: DHA, docosahexaenoic acid; EPA, eicosapentaenoic acid; NHANES, National Health and Nutrition Examination Survey

**Table S3.** Crude and adjusted models for the association of exposure to SHS exposure and overweight and obesity<sup>a</sup> among U.S. children, ages 6-19 years, 2007-2010 NHANES

|                             | NNAL Exposure                       |                                | Cotinine Exposure                   |                                | Self-report of Household Smokers    |                                |
|-----------------------------|-------------------------------------|--------------------------------|-------------------------------------|--------------------------------|-------------------------------------|--------------------------------|
|                             | Overweight vs. Normal ORs (95% CIs) | Obese vs. Normal ORs (95% CIs) | Overweight vs. Normal ORs (95% CIs) | Obese vs. Normal ORs (95% CIs) | Overweight vs. Normal ORs (95% CIs) | Obese vs. Normal ORs (95% CIs) |
| <b>Crude</b>                |                                     |                                |                                     |                                |                                     |                                |
| Below LOD/None              | 1 <sup>b</sup>                      | 1                              | 1                                   | 1                              | 1                                   | 1                              |
| Low                         | 1.2 (0.9, 1.6)                      | 1.6 (1.2, 2.3)                 | 1.2 (0.9, 1.6)                      | 1.2 (1.0, 1.5)                 | 1.2 (0.8, 1.9)                      | 1.8 (1.3, 2.3)                 |
| High                        | 1.2 (1.0, 1.6)                      | 1.9 (1.4, 2.6)                 | 1.1 (0.1, 1.4)                      | 1.8 (1.4, 2.3)                 | 0.8 (0.4, 1.3)                      | 1.6 (1.0, 2.4)                 |
| p for trend <sup>c</sup>    | p=0.18                              | p<0.01                         | p=0.40                              | p<0.01                         | p=0.59                              | p<0.01                         |
| <b>Model 1<sup>d</sup></b>  |                                     |                                |                                     |                                |                                     |                                |
| Below LOD/None              | 1                                   | 1                              | 1                                   | 1                              | 1                                   | 1                              |
| Low                         | 1.3 (0.9, 1.8)                      | 1.7 (1.2, 2.5)                 | 1.2 (0.9, 1.6)                      | 1.3 (1.0, 1.6)                 | 1.2 (0.7, 1.9)                      | 1.7 (1.2, 2.4)                 |
| High                        | 1.3 (1.0, 1.7)                      | 2.2 (1.6, 3.1)                 | 1.2 (0.8, 1.6)                      | 1.9 (1.4, 2.5)                 | 0.8 (0.5, 1.6)                      | 1.7 (1.1, 2.8)                 |
| p for trend                 | p=0.08                              | p<0.01                         | p=0.29                              | p<0.01                         | p=0.84                              | p<0.01                         |
| <b>Model 2<sup>e</sup></b>  |                                     |                                |                                     |                                |                                     |                                |
| Below LOD/None              | 1                                   | 1                              | 1                                   | 1                              | 1                                   | 1                              |
| Low                         | 1.5 (1.1, 2.1)                      | 1.8 (1.3, 2.7)                 | 1.3 (0.9, 1.9)                      | 1.6 (1.1, 2.0)                 | 1.2(0.6, 2.4)                       | 2.0 (1.4, 3.0)                 |
| High                        | 1.4 (0.9, 2.0)                      | 2.5 (1.7, 3.5)                 | 1.1 (0.8, 1.6)                      | 2.1 (1.5, 3.0)                 | 0.8 (0.3, 1.7)                      | 2.1 (1.3, 3.3)                 |
| p for trend                 | p=0.04                              | p<0.01                         | p=0.36                              | p<0.01                         | p<0.05                              | p=0.74                         |
| <b>Model 2b<sup>f</sup></b> |                                     |                                |                                     |                                |                                     |                                |
| Below LOD/None              | 1                                   | 1                              | 1                                   | 1                              | 1                                   | 1                              |
| Low                         | 1.4 (1.0, 2.1)                      | 2.2 (1.5, 3.2)                 | 1.7 (1.1, 2.6)                      | 1.7 (1.2, 2.7)                 | 1.0 (0.5, 1.9)                      | 1.5 (0.9, 2.5)                 |
| High                        | 1.2 (0.8, 1.8)                      | 2.1 (1.4, 3.2)                 | 1.1 (0.7, 1.6)                      | 1.9 (1.3, 2.9)                 | 0.7 (0.3, 1.6)                      | 1.6 (1.0, 2.7)                 |
| p for trend                 | p=0.18                              | p<0.01                         | p=0.33                              | p<0.01                         | p=0.30                              | p=0.02                         |
| <b>Model 3<sup>g</sup></b>  |                                     |                                |                                     |                                |                                     |                                |
| Below LOD/None              |                                     |                                |                                     |                                |                                     |                                |
| Low                         | 1.4 (0.9, 2.1)                      | 2.1 (1.5, 3.0)                 | 0.9 (0.6, 1.4)                      | 1.7 (1.1, 2.5)                 | 0.8 (0.4, 1.7)                      | 1.0 (1.0, 1.1)                 |
| High                        | 1.1 (0.7, 1.6)                      | 1.8 (1.2, 2.7)                 | 1.6 (1.1, 2.5)                      | 1.6 (1.1, 2.5)                 | 0.5 (0.2, 1.4)                      | 2.0 (1.4, 2.8)                 |
| p for trend                 | p=0.44                              | p<0.01                         | p=0.67                              | p=0.01                         | p=0.10                              | p=0.27                         |

Abbreviations: CI, confidence intervals; LOD, limit of detection; NNAL, 4-(methylnitrosamino)-1-(3-pyridyl)-1-butanol; OR, odds ratio; SHS, secondhand smoke

<sup>a</sup>Overweight was defined as having a body mass index  $\geq 85$ th percentile and  $< 95$ th percentile and obesity was defined as having a body mass index  $\geq 95$ th percentile by age and sex, based on the 2000 Centers for Disease Control and Prevention growth charts.

<sup>b</sup>Reference category.

<sup>c</sup>Tests for trends were performed by treating the categorical exposure to SHS variable as a continuous variable in the logistic regression model.

<sup>c</sup>Adjusted for sex, age, race/ethnicity and poverty index ratio.

<sup>d</sup>Model 1 plus additional adjustment for the total caloric intake and physical activity levels.

<sup>e</sup>Model 1 plus adjustment for the total caloric intake and physical activity levels among children with information about maternal smoking during pregnancy (n=2,106).

<sup>f</sup>Model 2 plus additional adjustment for report of maternal smoking during pregnancy (n=2,106).
